# Supplementary material
Source: publisher figshare collection journal article supplement (https://sage.figshare.com/ndownloader/files/18737198)
Supplement: Supplementary file 1 [file 18737198]

## Sheet: Weight Management
Weight Management
Recommendation 1: Maintaining healthy weight (diet)
Importance
Rating	Themes	Illustrative Quotations
Uncertain Ratings (4-6)	Weight management is beneficial for heart health and quality of life but is difficult to control	•"Weight impacts so much in daily quality of life - ability to be comfortable, to transfer - as well as heart health I think this is strong clinical reason for recommendation. " (Caregiver A10) •"Weight management is very important, but hard to control" (Caregiver A12)
	Low-fat diet is difficult for patients receiving spinal fusion and experiecing rapid weight loss	•"Personally when I started steroids I had weight issues until I had a spinal fusion and after that sticking to a low-fat diet was difficult with rapid weight loss." (Individual w/ DMD B12)
High Ratings (7-9)	Patients who are wheelchair-bound are prone to weight gain and need education on healthy diet proactively	•"I don't have personal experience with corticosteroid use, but I understand some of the implications & risks of unnecessary weight gain while sedentary." (Individual w/ DMD B10) •"...Boys typically can gain a lot of weight being wheelchair bound and taking steroids. It is important to maintain a healthy weight." (Caregiver A07)
	Steroids use can lead to weight gain and other side effects, so it is important to manage through healthy eating	•"This is an important aspect of maintaining a healthy weight while taking Prednisone or Emflaza." (Individual w/ DMD B07) •"Its very important because steroid use can make your weight increase so keeping a healthy diet will help lower the weight. " (Caregiver A28)
	Overweight can be detrimental to health and social life	•"Increased weight can greatly shorten the patients life. Also makes care difficult and cause further social ostricism." (Individual w/ DMD A12) •"We can't exercise so that takes a huge option out of maintaining fat and body mass. Diet has to be key." (Individual w/ DMD B10)
	Healthy diet is important as exercising is difficult	•"Unhealthy weight is especially troublesome for those with Duchenne because some exercise is hard to do." (Individual w/ DMD BB01)
Acceptability
Rating	Themes	Illustrative Quotations
Uncertain Ratings (4-6)	It can be difficult to find food that meets the guidelines, budget, and preference	•"This process is somewhat acceptable to an individual with Duchenne because it can be difficult to find food that fits your budget, guidelines, and taste. The phrase easier said than done comes to mind here." (Individual w/ DMD A10)
	It is difficult to control what family eat and what the child eats outside of home	•"...it's sometimes hard to control eating and family eating patterns" (Caregiver A12) •"We are dealing with kids/teenagers and they want to eat junk food just like everyone else...Although we make a lot of healthy choices, I also believe that I can't control everything he puts into his mouth..." (Caregiver A19)
	The recommendation is too general	•"Families and individuals might find recommendation 1 not specific enough." (Individual w/ DMD B12) •"The recommendations are too general, should be more specific to guide families towards a pretty strict nutrient rich diet as weight gain is a huge issue" (Caregiver A20)
	Diet alone may not be effective for non-ambulatory patients	•"We have spoken with nutrionists and we eat well, yet my son has gained way too much weight. I enjoy cooking and eating good food and have passed this on to my son. We don't eat processed food and do not drink soda. He still gained weight very quickly once non-ambulatory." (Caregiver B05)
	Eating out may be the only opportunity for the patient's social interaction with peers	•"Boys with Duchenne don't feel they have a lot to connect them with others, especially their peers. Sometimes, going out to eat, or having a friend over for a meal is their social interaction." (Caregiver B31)
High Ratings (7-9)	Meeting with a dietician/nutritionist should be easy	•"I think meeting with nutritionist (or whatever other edu is used) regularly is something most families can work into their lives." (Caregiver A10)
	It is easier for the patient if the whole family participates	•"It is great when the family joins in healthy eating. I couldn't get others to give up junk food. It makes it hard when my son wants what others have to eat..." (Caregiver A29)
	The internet is helpful for finding diets for weight management	•"Most people have access to the internet. Also their doctor can refer them to a nutritionist if they feel more comfortable with that." (Caregiver A16)
	It is important to manage weight proactively	•"It's difficult to lose weight once a Duchenne patient becomes overweight because many types of exercise are difficult, so it's best to maintain weight through diet." (Individual w/ DMD B01) •"Initiating healthy eating at the start of treatment is a good way to keep weight under control long term." (Caregiver B30)
	Education is a simple way to control diet	•"Education is one simple way to control diet and eating habits. For a first step, that should be easily acceptable at the very least." (Individual w/ DMD B10) •"This can easily be done at clinic." (Caregiver B24)
	The recommendation is too general	•"These recommendations are good for the public in general. More specific information about portions and types of meals would be helpful." (Caregiver B21)
	It can be difficult for some families	•"Might be difficult for some families to do." (Individual w/ DMD B11) •"Duchenne families are inundated with so many health issues, medication, appointments, stretching, etc. Sometimes it is difficult to have a battle over proper nutrition too." (Caregiver B41)
Recommendation 2: Maintaining healthy weight (nutrition)
Importance
Rating	Themes	Illustrative Quotations
Low Ratings (1-3)	Overwhelming and too much micromanaging	•"Let the child live." (Individual w/ DMD B05) •"Sounds a little too strict and involved." (Individual w/ DMD B09)
Uncertain Ratings (4-6)	Important information but also a lot to take in	•"Important information, but would take a lot of educating of family members and the DMD patient." (Caregiver A39)
	Having a plan is better than just education	•"A plan is better than just edu." (Caregiver A10)
	Overwhelming and too much micromanaging	•"...The clinical reason remains the same and is important but Recommendation 2 sounds like overkill. We were never given such a detailed instruction as I remember… " (Caregiver B04)
	Unclear how much it differs from recommendation 1 (education)	•"It's unclear to me, at least, how much this will differ from the previous recommendation." (Individual w/ DMD B01)
High Ratings (7-9)	Use of steroids can cause a lot of weight gain which is unhealthy	•"Glucocorticoid's can cause a lot of weight gain which can be unhealthy." (Caregiver A07)
	Maintaining a healthy weight improves quality of life	•"Everything from transfers, to going to the bathroom, and managing spinal health and comfort is easier when you are at a healthy weight." (Individual w/ DMD A02)
	Most people don't know how to eat healthy and need help from a nutritionist	•"...The reason for this recommendation is clear and most families need to help nutritionists to establish how much their child needs to eat." (Individual w/ DMD A01) •"Most families may need guidance in this area." (Caregiver A40)
	A regimented plan is valuable	•"I actually like this recommendation because it makes it easier to follow..." (Individual w/ DMD B12) •"…If a goal or recommendation was created for you it would be much easier to follow a diet or plan better than just trying to guess how much is ok to feed our kids." (Caregiver A25)
	Involving the patient in the process is important	•"Great idea and getting the patient invested in the process is important." (Caregiver B05)
	Excess weight stresses and deteriorates the body	•"Nutrition is important to maintain, especially in individuals with DMD, because we have to watch body deterioration as much as possible...nutrition has to be important when weight gain enters the picture." (Individual w/ DMD B10) •"Important for person with Duchenne, because more weight causes more stress on the body..." (Caregiver B28)
Acceptability
Rating	Themes	Illustrative Quotations
Low Ratings (1-3)	Plan does not seem necessary if not requested or if weight gain is not an issue	•"Not clear to me how strict this plan is but does not seem necessary to me. Perhaps only undertaken if requested or if weight gain is an issue." (Caregiver B04)
	Very difficult to follow	•"It is very hard to follow a diet plan since boys with Duchenne eat to ease their boredome and frustrations." (Caregiver B09)
	Should be open to alternatives as activity and metabolic rates vary by individual	•"Again, activity levels should be considered by the nutritionist, but not focused on by the patient. I know someone who is non ambulatory and was told they burn no calories, so they shouldn't eat any...Can we not focus on what is going in and how much? Maybe include a metabolism booster in their treatment?" (Caregiver B31)
Uncertain Ratings (4-6)	Difficult to control preteen and teenager eating habit	•"So hard to control preteen and teenager eating habits. Eating is one thing they can enjoy ." (Caregiver A12)
	Gathering the information for the nutritionist might be a problem	•"I think it's very important to follow the recommendations but I think gathering the information for the nutritionist might be a problem." (Caregiver A16)
	Very difficult to follow	•"Very difficult to manage." (Caregiver A39)
	Portion control can be an issue	•"We have healthy eating habits. Portion control is our issue." (Caregiver B05)
	A nutritional guide would be more acceptable	•"Being given a nutritional plan would be a good guide to follow to know what is acceptable to eat..." (Caregiver B28)
	Weight needs to be monitored both before and after steroid initiation	•"When many of the DMD guys begin steroids they are young and still active so weight may not be a concern at first but may need to be monitored after being on steroids for a while and before it is too late" (Caregiver B37)
High Ratings (7-9)	Easy to follow if nutritionists are accessible in multi-disciplinary clinic and available during visits	•"Should be easy to follow if nutritionist visit is included with multi-disciplinary clinic and is readily available during clinic visits." (Caregiver A20)
	Knowledge about healthy food will keep the patient active	•"To help keep little boys as busy and active and knowledgeable about whats foods will help keep them active for as long as possible." (Caregiver A26)
	Acceptable especially when the nutritionist develops an individualized plan	•"I like this idea because it provides more specific nutritional intake and limits than recommendation 1." (Individual w/ DMD B12) •"Nutritionists can help the individual develop a personalized diet plan taking in to account the age and weight of the person and recommend the proper calories and food choices." (Caregiver A07)
	A nutritionist can inform nutrition needs based on medication	•"More information on nutrition is always helpful because people don't always understand how nutrition needs change based on medicines being used." (Individual w/ DMD B01) •"The fact that my son gained a lot of weight on steroids makes this important to me. " (Caregiver B19)
Recommendation 3: Maintaining healthy weight (exercise)
Importance
Rating	Themes	Illustrative Quotations
Low Ratings (1-3)	Should focus on stretching, PT, OT instead of exercise	•"I feel like stretching and range of motion is more important than exercise" (Individual w/ DMD B12)
	Age is important. Some patients started steroid therapy very young	•"...This seems like a silly recommendation for the parent of a 3 year old--the age my son was at when he started steroids..." (Caregiver A06)
	Concerns about overexercising leading to muscle damage	•"We were more concerned about our son overdoing the exercising and causing muscle damage that could not be repaired." (Caregiver B25)
Uncertain Ratings (4-6)	Exercise is very difficult to do and maintain	•"Exercise is very difficult to do." (Caregiver A17)
	Some doctors and physical therapists recommend limiting exercise to avoid muscle damage	•"My doctors and physical therapist have suggested to limit overworking my muscles since childhood." (Individual w/ DMD B10) •"Exercise can be counterproductive with Duchenne and can cause more damage then good." (Caregiver B12)
High Ratings (7-9)	Important to start the recommendation before steroid initiation	•"...I think starting these recommendations before initiating steroids is a key time." (Caregiver A25)
	Important to learn exercises that are proper for patients and safe for muscles and bones	•"Overexertion can speed up the muscle weakness, so it's important that it's done under the supervision of a physical therapist with expert knowledge of Muscular Dystrophies." (Individual w/ DMD B11) •"It's good to encourage it, educate people on proper stretches, exercises that are not damaging to muscles or if possible to help with strength or flexibility for those with Duchenne, and how often …
	Healthy weight gain is important	•"Very important, weight gain on a body with Duchenne is not good and could create more problems along with it." (Caregiver B28)
Acceptability
Rating	Themes	Illustrative Quotations
Low Ratings (1-3)	Family dynamics and mobility of individual may be prohibitive	•"I think the dynamics of the family and the mobility of the individual on whether this will be acceptable or not. " (Caregiver A16)
	Difficult to get proper information about safe exercises	•"I gave this a 3 because I found it very hard and frustrating to get the proper information of what I can and can't do for exercises. It may have changed from 10 years ago but to this day I still have not have had a clear answer ..." (Individual w/ DMD A04)
	Patients can be too weak to exercise	•"Eventually I got too weak to do any exercises." (Individual w/ DMD B12)
Uncertain Ratings (4-6)	Patients can be too weak to exercise	•"Due to decreased strength now it is very difficult for my son to exercise." (Caregiver A02)
	Families can become stressed by the multiple recommendations	•"…I think families who are stressed by DMD will have trouble accepting even more recommendations/directions on what is acceptable ways for them to live their lives..." (Caregiver A10)
	Exercise can be risky even with safeguards	•"However exercise can be risky especially when falls happen which in my experience can lead to fractured bones. So even in process you mentioned with the safe guards these risks will be there but the process is still acceptable because the reward of increased quality of life is greater in my experience." (Individual w/ DMD A10)
	Exercise should happen in other times than the initiation of steroids	•"I gave a 6 because it is an easy process for the family, but again, I would hope this would happen at times other than at time of glucocorticoid initiation. If you really have to add on to what is an incredibly long appointment then it should be repeated later - especially since the childs needs and abilities will change over time. " (Caregiver B04)
	Difficult to find the right therapist that is covered by insurance	•"This sounds like some care that may not be guaranteed to be covered by insurance, so it may not be feasible for some." (Individual w/ DMD B01) •"Very difficult to find a physical therapist with enough expertise." (Individual w/ DMD B11)
High Ratings (7-9)	Therapists can recommend proper, personalized exercises	•"Education from physical therapist is acceptable because they understand what sort of exercise can or can't be done." (Individual w/ DMD B10) •"Therapists can recommend good exercises personalized for the patient." (Caregiver A07)
	Meaningful is the whole family participates	•"If the whole family is involved and why, it will mean more. No one is singled out. " (Caregiver A26)
	Easy to incorporate into clinic visits	•"Very easy to incorporate into clinic." (Caregiver A24)

## Sheet: Bone Health
Bone Health
Recommendation 1: Assessment of spinal health and detection of vertebral compression fractures
Importance
Rating	Themes	Illustrative Quotations
Low Ratings (1-3)	Assessments not as important once individuals are non-ambulatory	•"Once they are non ambulatory, and usually fused surgically, does this really matter?" (Caregiver A14)
Uncertain Ratings (4-6)	Scoliosis and back pain affect the importance of assessments	•"I personally haven't experienced these problems or seen them in others. I would only do it if I had a high degree of scoliosis or back pain. " (Individual w/ DMD A12)
	Spinal fusion affects importance of assessments	•"I'm 32 years old with Duchenne, I quit using steroids at age 10 due to the negative effects. I did however have spinal fusion surgery at age 13 due to scoliosis. So bone health issues have effected me just not due to steroids." (Individual w/ DMD B08) •"What affected my response is that I have, and others with Duchenne, have had spinal fusion so I already get it checked every once in a while." …
High Ratings (7-9)	Having a baseline is important for future comparison	•"In order to assess spinal health and detect virtual conversion fractures requires a baseline to compare future test results, therefore the clinical recommendation is very important. Individuals/families would like to detect and treat bone problems early to avoid long-term damage and pain." (Individual w/ DMD A01) •"Spinal imaging should be monitored for scoliosis and compression fractures. A ba…
	Future quality of life concerns	•"I think this should done early on so that you can better plan for the future. Due to me not getting this early on, I feel that my posture and some back pain could have been not as much of a problem. It such a simple test but it could change your quality of life." (Individual w/ DMD A04) •"Bone health is so.important, the boys are so prone to breaks, so medical care and education on how to take …
	Bone health is affected by steroid use so assesments are important	•"I think bone health is affected by steroid use and therefore needs to be monitored. " (Caregiver B19)
Acceptability
Rating	Themes	Illustrative Quotations
Low Ratings (1-3)	Difficulty and pain transferring individuals to an X-ray table	•"Even though this recommendation is very medically sound and important the process explanation...glosses over the fact that transferring to an x-ray table may be very hard and possibly painful if you use a wheelchair that has a cushioned seat. My experience with x-ray tables is that they don't have cushions and can be very hard to Transfer to..." (Individual w/ DMD A10)
Uncertain Ratings (4-6)	Difficulty and pain transferring individuals to an X-ray table	•"For ambulatory boys I think this is fine, getting on a table is easy. New wheelchair users can be manually lifted easy. But after around 2 years transfers can be hard and most facilities don't have a hoyer lift, and if they do it may not work depending on the table. " (Individual w/ DMD A12) •"'X-rays are relatively quick to perform but require patients to lie on an x-ray table.'" No they are n…
	Cost and concerns about insurance coverage make the process difficult for families and caregivers	•"It is important to have this detection but would need to be recommended by the doctor (not all doctors will recommend) and then having the xray may be difficult with knowing where to go and when and having insurance cover it and reporting it back to the doctor then having the doctor to discuss it with the patient and family. Seems like a lot of steps that would need to be followed through on." …
High Ratings (7-9)	Procedure is minimally invasive	•"Lying on an x-ray table for a few x-rays is perfectly within reason. I see no issues there even if the table is not comfortable for a 5-10 minutes. I have severe contractures across every joint, and if I can lay there on a flat x-ray table for 10 minutes, then I believe anyone can." (Individual w/ DMD B10) •"If X-rays are done during the early stages of DMD, most boys will not have any issues l…
	Cost and insurance coverage affect acceptability of procedure	•"I think it is rather acceptable but I think insurance and doctors need to be proactive in approving this. It could be a hardship for families without financial resources, adequate insurance and the free time to have this done." (Caregiver B41)
	Scans are important for future quality of life	•"I would of appreciated an xray and an explanation of what could of happened to my son long before the curvature in his spine had to have surgery with double rod placements" (Caregiver B16) •"Need to prevent bone breaks which can cause quick disease progression due to bone healing process" (Caregiver A03)
Recommendation 2: Assessment of bone health/mineralization using dual energy X-ray absorptiometry (DEXA) scans
Importance
Rating	Themes	Illustrative Quotations
Low Ratings (1-3)	Assessment is not relevant	•"The assessment doesn't have a direct effect on the individual" (Caregiver A16)
Uncertain Ratings (4-6)	Assessing bone density is less important if previous tests already show poor bone health	•"Being in a wheelchair long-term means you will suffer from poor bone density. It is a fact. Steroids will contribute to this. Assessing the density seems redundant." (Individual w/ DMD A02) •"Not necessary current tests are sufficient" (Caregiver B13)
	Unfamiliar with this assessment	•"This is something that I have NEVER been approached about and don't understand" (Caregiver B16) •"This is ( previous to this moment ) an unknown process. I guess it makes sense and would be important for those who used steroids." (Caregiver A10)
High Ratings (7-9)	Important for identifying the time to start taking vitamins	•"Very important starting calcium, vitamin D, supplements and prescriptions that help" (Caregiver A12) •"This is very helpful. My son had one done along with blood work and it showed that he could benefit from more vitamin D and vitamin C ." (Caregiver A28) •"I am concerned and so are my parents about the dangers of fracturres. I usually have lower vitamin D levels during the winter and I get con…
	Very necessary for ambulatory patients to help avoid fractures	•"More important for ambulatory patients because they're more susceptible to falling. Less important if the patient is using a Hoyer or other lift because transfers like that are safer. Also, an ambulatory patient is less likely to have fragile bones." (Individual w/ DMD B11) •"If the child is non ambulatory, the necessity lessens for me. If still ambulatory then this is still very important. " (…
	Early detection of bone thinning	•"I do think density is important and catching weak and thinning bones early is important. " (Caregiver B47) •"I think it's important to keep an eye on how the disease is progressing and to check the density in case if it is changing too fast relative to normal person & requires some treatment." (Individual w/ DMD B10)
Acceptability
Rating	Themes	Illustrative Quotations
Low Ratings (1-3)	Additional tests are not necessary	•"The scan isn't going to help "solve" for the poor bone density. Nonambulatory conditions always result in loss of bone density, so skip to treating it for everyone." (Individual w/ DMD A02) •"Additional battery of tests not necessary" (Caregiver B13)
Uncertain Ratings (4-6)	Cost of scan is high	•"My son is comfortable with the process but my out-of-pocket is high." (Caregiver A02) •"The Dexa scan costs over $1000. " (Caregiver A40)
	DEXA scans are not as high priority as other procedures	•"It is important for this to be done but may not be top priority for some families as it will require many steps and follow through." (Caregiver B37) •"i suppose this would be acceptable yet if this was recommended to us, I may opt not to do this if I had to cut down on all the visits to specialists - I would go to pulmonologisty, cardiologist, neurologist, nutritionist, digestive tract speciali…
	DEXA scan is difficult for patients	•"Similar to the spine xray the DEXA scan is difficult for patients who are non-ambulatory, heavy, and have contractures of the joints. Those administering the test need to have a great deal of patience and problem solving skills. " (Caregiver B05) •"Too many medical appointments and tests reduce a patient's time to live their life. A standard X Ray can show if there is significant bone fragility…
High Ratings (7-9)	Cost and insurance coverage affect acceptability of procedure	•"Quick, safe, and painless...only hesitation would be the insurance coverage and cost." (Caregiver A38) •"We have had issues getting the x-rays performed. Our insurance would not allow the x-rays to be done at Childrens National Medical Center which is where we attended MDA clinic. The x-ray labs that our insurance covered were unable to perform the dexa scans -- they said that after his spinal …
	Benefit of DEXA scans outweighs inconvenience	•"Though it was an extra doctor appointment, it was not intrusive and easy enough for the benefit it reaps." (Caregiver B22) •"This scan can become a challenge as an individual with Duchenne ages. However, the inconvenience of this scan is worth it. " (Individual w/ DMD B07)
	Regular scans are best way to monitor bone density and take preventative measures	•"I feel it is always good to take preventive clinical measures." (Individual w/ DMD B08) •"I believe once per year is the best way to monitor bone density." (Caregiver B35)
Recommendation 3: Treatment of vertebral fractures and bone loss with IV bisphosphonates
Importance
Rating	Themes	Illustrative Quotations
Low Ratings (1-3)	Off label for children under 18	•"It's not widely available and not really for children under 18" (Caregiver A16) •"It's off label for children...cost, insurance coverage, safety....I don't feel this is something for the typical DMD family." (Caregiver A38)
Uncertain Ratings (4-6)	More information is needed about side effects and the process	•"More information should be provided about how the drug is administered, the expected or potential positive effects of the drug (will is slow, stop or reverse osteoporosis?) and the potential side effects." (Caregiver B21) •"I do believe the management of this is important but I also know a family who has done this and their child is experiencing horrible side effects. I do believe that if it he…
	Lack of experience with bone fractures	•"I put this at a 5 because I have not had this done before so I don't know if I should recommend this treatment or not but from reading it seems that does help ones who do get and assume that this be done with your local bone doctor." (Individual w/ DMD A04) •"As a parent of a younger child with DMD who hasn't had this problem so far, this wouldn't be as important for us at the moment. For someo…
High Ratings (7-9)	Important for preventing back pain	•"Important because some patients may begin on set stages of osteoporosis and this will become painful within time. If there is something that can help manage the pain and or prevent it, it is very important for their health." (Caregiver B44) •"Families consider it very important to avoid pain as possible because it can reduce what the individual with Duchenne can do." (Individual w/ DMD B01)
	This treatment is important for future quality of life and preventing complications	•"I understand this treatment is to treat osteoporosis and for prevention of further bone loss. I believe fighting bone loss is very important, and you want to do all you can. Especially for later in life when osteoporosis can make transferring the individual difficult. If you can prevent it as much as possible from early in life, it is worth it." (Individual w/ DMD B10) •"For long term bone heal…
Acceptability
Rating	Themes	Illustrative Quotations
Low Ratings (1-3)	Cost of the treatment can be prohibitive	•"Most people don't have the means to take their child to were they can receive this treatment and the age factor " (Caregiver A16) •"If no treatment is available in most countries, this is not a viable option except for the very wealthy. " (Caregiver A44)
Uncertain Ratings (4-6)	Off label for children under 18	•"Concerned about this treatment as it's another drug going into his body, and it's not approved for children." (Caregiver B30) •"The restriction for children in many countries would make me want to learn more before pursuing this course of treatment." (Individual w/ DMD B01)
	Concerns with adding medication and side effects	•"I have heard treatment with bisphosphonate has severe side effects." (Caregiver A02) •"Families have concerns with adverse effects or interactions with other drugs or supplements as well as the time to go to an infusion center. " (Caregiver A40)
	Acceptability depends on duration of treatment	•"I don't know how long the IV have to be. Would it be permanent and is that the only option?" (Individual w/ DMD B10) •"It is very expensive and the boys have to be hooked up to an IV for hours. The medication itself causes discomfort, but all in all it's important." (Caregiver B24)
High Ratings (7-9)	Acceptable for patients without aversion to needles	•"I believe that this is acceptable from what I have read but if you don't like needles or have a child that doesn't do good with needles, I would say this could be an issues but for the ones who can take that then I find it acceptable to get the treatment" (Individual w/ DMD A04) •"Some families/patients may be fearful of IV, possibly. And depending on the frequency it may be a difficult expense…
	More information is needed about side effects and the process	•"I would need to know more about bisphonsphonates. I do not know enough but prevention of fractures is important. I do not know how insurance views this treatment and how avalable it would be." (Caregiver B41) •"Patients and families should be prepared for the side effects that often results from the treatments--high fever, chllls. " (Caregiver A06)
	Treatment is important for treating bone fractures and preventing pain	•"My bone fractures were treated easily and successfully with no side effects with this treatment. I have had no recurrence of back pain/additional fractures during the two years of my IV treatments of pomidranate (spelling?) and I strongly recommend this treatment. " (Individual w/ DMD A02) •"Important for the patients to prevent severity of compressions, on set of osteoporosis and to keep them …

## Sheet: Vertical Growth
Vertical Growth
Recommendation 1: Assessment of growth
Importance
Rating	Themes	Illustrative Quotations
Low Ratings (1-3)	Height is not that important	•"My Philosophy is to pick your battles, and to me this just doesn't seem worth it, it's just height there are plenty of able-bodied people who are short and they're not medically trying to change that." (Individual w/ DMD A02) •"After initial diagnosis (age 5) of DMD, height/length didn't seem important to my son or our family members as there were other more important things in our minds (spina…
	Height is not as important if non-ambulatory	•"Height is going to be an impediment to ambulation, and if non ambulatory I don't see it as of particular importance unless obviously abnormally small." (Individual w/ DMD A12)
	Being shorter doesn't effect health	•"While I think it is important to monitor I believe you know ahead of time that the child will be shorter and that doesn't effect the health of the child and to me that is more important." (Caregiver B47)
	More tracking adds burden to the family	•"More tracking means more difficult visits for the entire family. Is this really necessary? Families need a choice. " (Caregiver B32 )
	Child is developing normally	•"My son height is above average." (Caregiver B09 )
Uncertain Ratings (4-6)	Height is not as important as other issues	•"With all of the other problems associated with Duchenne individuals families might not be as concerned with the height of the individual with Duchenne that functional mobility." (Individual w/ DMD A01) •"Vertical growth delays probably isn't as major of an issue as say delayed puberty or osteoporosis." (Individual w/ DMD B10) •"Height is not a huge issue as long as bone health isn't jeopardized…
	Measuring height is difficult and not very accurate once non ambulatory	•"Measuring height is extremely difficult once a DMD patient is non ambulatory. In fact--it's kind of ridiculous and not very accurate. " (Caregiver A06)
	Important to know that the child is in the same growth range as his peers	•"It's important to know how a patient compares." (Individual w/ DMD B01) •"It is important to identify any delays and to keep the individuals self-esteem up." (Caregiver B24)
High Ratings (7-9)	Important for early detection	•"It's important to start early to see if there is a growth problem before it starts effecting self esteem " (Individual w/ DMD B13) •"families with dmd want assurance that their child is developing as normally as possible, they want early awareness that there may be a problem." (Caregiver A20)
	Important to know that the child is in the same growth range as his peers	•"I agree that patient's growth and height must be followed to ensure that they are correct for the corresponding age." (Individual w/ DMD A09)
	Good to have data	•"Good to have the data and it's easy to check." (Individual w/ DMD B11) •"This is a simple and easy process that our boys endure each clinic visit. I think that any easy data is good to obtain." (Caregiver B44)
	Shorter stature may be beneficial	•"It's better he is shorter for easier movement. " (Caregiver A29) •"Height is important to most of the guys (and therefore their families) but it is not likely that their height will be comparable to healthy boys; and actually having a smaller stature may benefit them and their mobility" (Caregiver B37)
Acceptability
Rating	Themes	Illustrative Quotations
Low Ratings (1-3)	Height measurements are not accurate and difficult to do	•"Unless there is a treatment regimen--this is a waste of time from my perspective--not accurate--and difficult to do.--once patient is nonambulatory." (Caregiver A06)
	Too many doctor visits	•"Having an appointment every 6 months for height is tough on top of other appointments." (Individual w/ DMD A08) •"Too many doctor visits. " (Caregiver B32)
Uncertain Ratings (4-6)	Good to keep people with DMD in the big picure of this age group	•"I would rate it at 5/middle of scale if all people of this age are being tracked for height so that people with DMD are not lost from the larger picture statistics of children/youth/adults across the larger demographic and to be valuable to any researchers that would use it." (Caregiver A10)
	Height measurements are not accurate and difficult to do	•"I really don't like to use this method because I have found that many nurses measure height and weight differently, so the records may not be accurate. " (Caregiver B31) •"It's also harder to measure height when you are non ambulatory and have contractures." (Caregiver B08)
	Measuring height helps determine if the child is growing normally	•"This will help determine how well the child is growing." (Caregiver B35)
High Ratings (7-9)	Easy to do at regular visits	•"This is acceptable and easy to get done at every doctor you go to and since it's part of any doctor visit." (Individual w/ DMD A04) •"This would be very easy to be done. We usually go to clinic twice a year anyways & it is easy to obtain." (Caregiver B24)
	Important to ensure growth is on track and detect delays	•"Parents want to make sure their child has good self-esteem, seems to be growing normal and is keeping up with his peers." (Caregiver A31) •"This is the easiest of the visitation for the boys and I believe that it is very important to track each visit to identify any delays in growth." (Caregiver B44)
Recommendation 2a: Identification of impaired growth (patients 7 years of age and younger)
Importance
Rating	Themes	Illustrative Quotations
Low Ratings (1-3)	No reason to care about impaired growth	•"I don't see the reason to care about impaired growth" (Individual w/ DMD A02) •"Height is not of great importance to a DMD boy in the eternal scheme" (Caregiver A44)
	Not a common concern for typical families	•"I do not recall other families asking questions of me or discussing bone growth." (Caregiver A10)
	Not a concern until non-ambulatory	•"Growing up my doctors weren't concerned about bone health until I was unable to walk." (Individual w/DMD B12)
	There are other more pressing issues	•"Dealing with other effects of the disease over far more important than their height" (Caregiver B09)
	Concerns about radiation exposure	•"X-ray, not necessary to be put thru extra radiation when they may be exposed to it quite often as DMD progresses." (Caregiver B13) •"Not a fan of exposure to radiation." (Caregiver B14)
Uncertain Ratings (4-6)	Important if taking steroids	•"If patient is taking steroids then seems more important to track impaired growth. " (Individual w/ DMD A01)
	No problem unless glaringly obvious	•"I only see a problem if it's glaringly obvious." (Individual w/ DMD A12)
	May be normal for late boomers	•"Under 7 years there could be a lot of variations for even non Duchenne." (Caregiver A17)
	Important to start early so you can tell if there is a growth problem starting or progressing	•"It's important to start early and continue so you can tell if there is a growth problem starting or progressing" (Individual w/ DMD B13) •"Being proactive is important." (Caregiver B24)
	Physical health is more important	•"While impaired growth is important I tend to focus more on physical health and feel it is more important." (Caregiver B47)
	Height is not a major concern	•"Height is not a major concern for my family. " (Caregive B19)
High Ratings (7-9)	Early detection is key	•"I can see the importance of being proactive early on though before the individual becomes more of an extreme anomaly for the age later on relative to peers." (Individual w/ DMD BB10) •"This would be important so the doctors can manage and watch as the child grows and be sure they are not delayed and if they are can take steps to help." (Caregiver A45)
	It provides a clear picture of bone growth	•"It makes sense to objectify what is going on with an x-ray so that you can be sure and to provide you with more information." (Caregiver A25) •"The clinical reason for recommendation 2a is very important to an individual with Dhohenne because the X ray as explained feels like it gives a more concrete measurement than recommendation 1 does." (Individual w/ DMD A10)
	An x-ray should be performed if suspecting impaired growth	•"If there is suspected impaired growth, then an x-ray test should be performed." (Individual w/ DMD A09)
	Important if taking steroids	•"Maybe less important in patients who don't take steroids." (Individual w/ DMD B11) •"It was good to have a baseline before steroids started and I think was very helpful to determine bone health after steroids began." (Caregiver B25)
	Easy process	•"This is also a very easy process for the boys to endure." (Caregiver B44)
Acceptability
Rating	Themes	Illustrative Quotations
Low Ratings (1-3)	Up to parent and patient	•"Up to patient and parent." (Caregiver B13)
Uncertain Ratings (4-6)	Out of pocket cost can be high	•"We had very good insurance, so the cost of the test was not an issue for us but I imagine it could be quite high for anyone without insurance." (Caregiver B25) •"Insurance out of pocket is high." (Caregiver A02)
	May not be necessary for children under 7	•"The x-ray would be painless but I feel like the child is too young. He would still have plenty of time to grow." (Caregiver A38)
	Patient may be too young to cooperate	•"This recommendation's process is somewhat acceptable to an individual at this age with Duchenne because it can be harder to explain and get the cooperation of the patient." (Individual w/ DMD A10)
	Acceptable if it's indicated	•"Acceptable if impaired growth is suspected, and something can be done to treat the issue." (Caregiver B28) •"This process seems acceptable to me if it is recommended by the doctor and if my son and his peers were of this age I would have followed this process if recommended. " (Caregiver A10)
High Ratings (7-9)	The procedure is simple, non-invasive, and low-risk	•"It has limited risk associated with it and it is non-invasive." (Individual w/ DMD A01) •"A very easy and tolerable process that the boys go through each year and if this helps with their quality of care, it should be done in all clinics." (Caregiver B44)
	Acceptable if it's indicated	•"If a doctor suspects an issue, an X-Ray is no big deal." (Individual w/ DMD B01) •"I think acceptable that way families can get them the help they need if they are delayed in growth." (Caregiver A45)
	X-rays provides objective information about bone growth	•"X-rays are a good way to see the bones to tell if there is impaired growth." (Caregiver A07)
	Concerns about radiation exposure	•"Its fairly simple, but i don't want to have to have a lot of xrays taken." (Caregiver A42)
	Easy to accomplish for this age group	•"For a patient that young who I assume is still fairly ambulatory this should be easy to accomplish. " (Caregiver B05)
Recommendation 2b: Identification of impaired growth (patients between 8 and 12 years of age)
Importance
Rating	Themes	Illustrative Quotations
Low Ratings (1-3)	Not important if not taking steroids	•"I do not recall other families asking me questions about impaired bone growth beyond possible impacts of steroids (which my son did not use and was therefore not on top of my mind nor was I asked too often)." (Caregiver A10)
	Shorter stature may be beneficial	•"So what? speaking as someone who is barely five feet tall, it's easier to be healthy later on if you are smaller anyways" (Individual w/ DMD A02)
	Concerns about radiation exposure	•"I do not see the value in exposure to radiation when we already know a DMD boy will have impaired bone growth." (Caregiver B14)
Uncertain Ratings (4-6)	Concerns about self-esteem	•"Between the ages of 8 to 12, individuals/families are more concerned if there is a growth impairment. The boy is probably getting concerned about keeping up with their peers and maybe suffering some self-esteem problems associated with the not fitting in." (Individual w/ DMD A01) •"At this age, greater discrepancies in height may appear. Boys may become more aware and concerned. Knowing potenti…
	No problem unless glaringly obvious	•"I only see a problem if it's glaringly obvious." (Individual w/ DMD A12)
	Important if taking steroids	•"Important if taking steroids." (Individual w/ DMD A05)
	Height is not as important as other issues	•"If slow growth impacted a faster loss of ambulation I would be more concerned. My family isn't concerned with height." (Caregiver B07)
	More important in this age group than the younger years	•"It is slightly more important than the younger years since this is optimal growth time." (Caregiver B47)
High Ratings (7-9)	X-rays provide useful information	•"The clinical reason for recommendation 2 is very important to an individualMwith Duchenne because the X ray as explained feels like it gives a more concrete measurement than recommendation 1 does." (Individual w/ DMD A10)
	Very important for this age group to start considering recommendations that help growth	•"I think this is right before puberty so probably a good time to be more active in identifying impaired growth before it's too late ." (Individual w/ DMD B10) •"The child is older and closer to puberty therefore if an intervention to help him grow is needed it would need to be done during that age range." (Caregiver A38)
	Early detection makes management easier	•"Early detection makes management easier." (Caregiver A43)
	Important if taking steroids	•"Maybe less important in patients who don't take steroids." (Individual w/ DMD B11)
	Important to keep boys healthy	•"I would think at this age it would become more important to the child to be around the same height as his peers, and also it is important for their health." (Caregiver B37)
Acceptability
Rating	Themes	Illustrative Quotations
Uncertain Ratings (4-6)	No reason for taking more x-rays	•"Still no reason for more X-rays." (Individual w/ DMD A02)
	The procedure is simple, non-invasive, and low-risk	•"Very acceptable as the x-ray would be simple and painless procedure." (Caregiver A12)
	Acceptable if it's indicated	•"This process seems acceptable to me if it is recommended by the doctor and if my son and his peers were of this age I would have followed this process if recommended." (Caregiver A10)
	Insurance may not cover	•"Reasonable for people with insurance; for those without insurance it may not be as acceptable since they probably wouldn't be able to afford the treatment." (Caregiver B25)
	Most critical time to see if there are hormonal issues	•"I think this is the most critical time to see if there are hormonal issues as well." (Caregiver B31)
High Ratings (7-9)	The procedure is simple, non-invasive, and low-risk	•"Having an x-ray once a doctor suspects impaired growth seems acceptable. It has limited risk associated with it and it is non-invasive." (Individual w/ DMD A01) •"Again, its relatively non-invasive, and monitoring growth can't hurt." (Caregiver B07)
	Enabling parents to compare their child's growth to those with and without DMD	•"The parents can access their childs growth compared to those with and without DMD." (Caregiver A31)
	Checking for growth impairments could keep the boys mobile longer	•"By keeping up with the latest technology to check for growth impairments could also keep the boys mobile longer" (Caregiver B36)
Recommendation 2c: Identification of impaired growth (patients between 13 and 18 years of age)
Importance
Rating	Themes	Illustrative Quotations
Low Ratings (1-3)	Height is not that important	•"Height isn't important." (Individual w/ DMD A02)
	Small stature helps ease heart strain and improve logevity	•"At this age being smaller and lighter can improve longevity and ease heart strain." (Individual w/ DMD A12)
	Growth hormone might not help/be too late in this age group	•"He would already be entering/completing puberty therefore a growth hormone might not help him." (Caregiver A38)
	Not important for DMD individuals	•"Not with DMD, but definitely with non DMD individuals." (Caregiver B14)
	Height is not as important for older patients	•"As child gets older height is not that important of a factor." (Caregiver B19)
Uncertain Ratings (4-6)	Important if taking steroids	•"Important if taking steroids." (Individual w/ DMD A05)
	Growth hormone might not help/be too late in this age group	•"It would probably be too late to intervene by this age." (Caregiver A40)
	Not as important if the child has spinal fusion	•"It's Important to identify any impaired growth suspected, but may not be as important at this age if the child had a spinal fusion." (Caregiver B08)
	Patients may ask for this test at this age	•"Boys with DMD may self advocate at this age and ask for this test." (Caregiver B21)
	It is only one predictor for growth	•"It is only a predictor of final growth in the skeleton." (Caregiver B01)
High Ratings (7-9)	Necessary for the evaluation of impaired growth	•"Having an X-ray for the purpose of evaluating impaired growth is necessary." (Individual w/ DMD A09) •"The teen years are a good time to chart the progression of bone development and compare it to the normal range of others." (Caregiver A07)
	Concerns about self-esteem	•"The boy as a teenager is probably concerned about keeping up with their peers and maybe suffering some self-esteem problems associated with the not fitting in. By this age it seems that in may be nearing the time when there is an ability for further growth." (Individual w/ DMD A01) •"Many families struggling with appearance, lack of normal growth at this age range, kids want to develop normally…
	Good for documentation and early detection	•"Early detection is key for better management." (Caregiver A43)
	May be the last chance for intervention	•"This is later in childhood, of course, so if there is impaired growth during these later puberty years then I can see a more dire need to get this checked out." (Individual w/ DMD B10) •"This is a critical time to obtain bone maturity information due to the time frame of when growth no longer happens." (Caregiver B35)
	Informing treatment decisions	•"I think the recommendation is still important to determine how tall they will be. It could also play into decisions about treatment decisions." (Caregiver B24)
Acceptability
Rating	Themes	Illustrative Quotations
Uncertain Ratings (4-6)	No reason for taking more x-rays	•"No reason to do unnecessary x-rays." (Individual w/ DMD A02)
	Acceptable if it's indicated	•"This process seems acceptable to me if it is recommended by the doctor and if my son and his peers were of this age I would have followed this process if recommended." (Caregiver A10)
	Growth hormone might not help/be too late in this age group	•"...Also, you have little time to promote growth through treatments." (Caregiver B31)
	Insurance may not cover	•"Again, the question of medical necessity is important for obtaining payment. " (Caregiver B21)
	May be difficult due to contractures	•"A hand X-ray seems very simple, but may be difficult at this age due to any contractures in the wrists, hands and fingers." (Caregiver B08)
High Ratings (7-9)	The procedure is simple, non-invasive, and low-risk	•"Simple procedure." (Individual w/ DMD A12) •"it is simple and no pain involved." (Caregiver B09)
	More acceptable in this age group than the younger years	•"This recommendation is even more acceptable than 2a or 2b because in my experience the older you get the less stressful x rays or other scans are." (Individual w/ DMD A10)
	Enabling parents to compare their child's growth to those with and without DMD	•"The parents can access their childs growth compared to those with and without DMD." (Caregiver A31)
	May be difficult to do	•"X-rays are sort of difficult to do becaus it can be painful to lie on an x-ray table so I rated it slightly lower." (Individual w/ DMD B12) •"I agree if a patient can tolerate it, then its good but many can not at this stage" (Caregiver B44)
	More vital to keep an eye on growth impairments especially the spine in this age group	•"The older the boys get the more vital it is to keep on everything to.keep an eye on growth impairments especially the spine." (Caregiver B36)
Recommendation 3: Identification of reasons for impaired growth and development of a treatment plan
Importance
Rating	Themes	Illustrative Quotations
Low Ratings (1-3)	Height is not that important	•"Height is still not important" (Individual w/ DMD A02)
	Growth delay has been known to be due to steroids	•"I guess I'm a little confused by this. Don't we know the growth is delayed due to steroids? " (Caregiver A39)
	Height is not as important as other issues	•"Not as important as other problems with the disease" (Caregiver B09)
	Everyone is unique	•"Everyone is unique." (Individual w/ DMD B05)
	Negative impact of extra weight and height	•"Extra weight and height may stress caretakers increasing chances of patient getting hurt all of his life." (Caregiver B13)
Uncertain Ratings (4-6)	Unsure if the recommendation is for those on steroids or for all patients with DMD	•"My son (now 20 non steroid using) has never been referred to an endocrinologist so I am unsure if growth impairment in DMD is related to steroid use of if this is for all people with DMD across the board no matter the treatment. I have not been a part of any discussions with other families on this and am unsure how to rate this overall as I do not have experience here to offer and am only now r…
	Need for endocrinologist to make treatment plans	•"The reason is not so important because most likely it is due to chronic steroid use but you need an endocrinologist to make a plan." (Individual w/ DMD B13)
	There may be other issues that can impact growth	•"I guess making sure it's not being caused by something else besides the steroids would be important. Individuals and famiilies, from personal experience, forget we can have other issues." (Individual w/ DMD B12)
	Attention to growth delays can negatively impact a child	•"Drawing further attention to his height and visiting even more doctors may negatively impact a boy with DMD." (Caregiver B11)
High Ratings (7-9)	Important to consult with an expert and determine a treatment plan	•"If impaired growth is identified, it is very important to understand why. Endocrinologist are the type of doctor you need to see to understand why there is impaired growth." (Individual w/ DMD A01) •"Determination of the reasons for impaired growth is very important along with the development of a individualized plan to treat the issue." (Caregiver B28)
	Important to prevent other issues	•"The reason for impaired growth could be something severe, such as poor nutrition or some bone condition or some disease, and I can definitely see the importance of finding out. Especially if the person already has muscular dystrophy." (Individual w/ DMD B10) •"Because of other possible health concerns not to do with DMD." (Caregiver B01)
	Important but unsure if these issues significantly affect quality of life	•"Want to address any issues, but will these issues significantly harm quality of life?" (Individual w/ DMD B11)
Acceptability
Rating	Themes	Illustrative Quotations
Low Ratings (1-3)	No reason to see more doctors	•"As someone with Duchenne, we spend more than enough time at the doctor no reason to add more for such a small reason." (Individual w/ DMD A02)
Uncertain Ratings (4-6)	Acceptable if it's indicated	•"If my son's doctor was making the recommendation, I would add it to the list of specialist to see ... " (Caregiver A10)
	Preferable if in multi-disciplinary settings	•"Preferable to visit with endocrine in presence of multi-disciplinary clinic" (Caregiver A20)
	Insurance may not cover	•"This requires an additional doctor visit and approval by an insurance company. This puts a greater burden on parents." (Caregiver B21)
High Ratings (7-9)	Informing options and alternatives of hormone for treatment	•"It is acceptable to just give them the option to want the treatment or not since I know some may not like the idea a giving/getting hormones due to their beliefs" (Individual w/ DMD A04)
	Good opportunities to clairify questions/casues and determine treatment	•"...A specialist is probably good idea to visit and definitely acceptable as first step to figure out the cause and plan of action." (Individual w/ DMD B10) •"Consultations can be enlightening and bring relief to families. Great opportunity for them to ask the doctors questions and create treatment plans." (Caregiver A38)
	Fairly non-invasive	•"It seems fairly noninvasive so individuals and families wouldn't have any issues with this" (Individual w/ DMD B12) •"I believe is is acceptable to meet with an endocrinologist for assistance. Talking with someone doesn't hurt anything." (Caregiver B47)
	Consultation is very important and easy to do	•"A consultation is very important and easy to do." (Caregiver B08)
Recommendation 4: Treatment of impaired growth with growth hormone therapy (combined age groups: ≤7, 8-12, and 13-18)
Importance
Rating	Themes	Illustrative Quotations
Low Ratings (1-3)	Need more evidence	•"...The inconclusive evidence about the use of the rhGH as a treatment casts doubt on its use at such a young age [under 7]." (Individual w/ DMD A01) •"...Long term studies need to be done to see if this even works. Children develop different." (Caregiver A31)
	High risk with little reward	•"I have DMD and yes I'm only 5 ft never took hormones as the side effects were not worth being a few inces taller." (Individual w/ DMD A07) •"Adding medication to an already sensitive system is not ideal." (Caregiver B22)
	Concerns about side effects	•"I believe that this treatment will cause the bones to become more brittle. Which will cause more breaks and other complications." (Caregiver B35)
	Most individuals and families would not want to do it	•"If it's not currently recommended, I don't think most individuals and families would be too concerned to do that." (Individual w/ DMD B12) •"I think most Duchenne families are accepting of the short stature. It is less weight and stress on the boy's body." (Caregiver A38)
	Height is not that important	•"Height isn't important" (Individual w/ DMD A02) •"Being of short stature would be one of the last things that worries me about Duchenne." (Caregiver B09)
	Shorter stature may be beneficial	•"I think most Duchenne families are accepting of the short stature. It is less weight and stress on the boy's body." (Caregiver A38)
	Growth hormone might not help/be too late in this age group (13-18)	•"At this age I believe it would be too late to start the growth hormone." (Caregiver A38)
Uncertain Ratings (4-6)	Must compare pros and cons	•"Must compare pros & cons." (Individual w/ DMD A05) •"Now that I think about it more and read others comments, I worry about side effects it could have and pain it can cause. My son wanted to be taller, but when he found out that it would be injections, he didn't want it... " (Caregiver A29)
	Fear the use of growth hormone in children under 7	•"Didn't have it done that early" (Individual w/ DMD A14) •"Growth hormones for little children scare me" (Caregiver A26)
	Children (under 7) grow at different rates	•"This may not be as important because all kids grow at different rates." (Caregiver A45)
	Concerns about side effects	•"The inconclusive evidence of effectiveness. What about side effects of treatment?" (Individual w/ DMD A01) •"I definitely have issue with putting a growth hormone into my son's body for fear of the reaction to the many other drugs he takes... " (Caregiver A19)
	Concerns about the need for daily injections	•"I don't know if 7 years or younger is too early or not for hormone therapy. I would wonder if there are other treatment options for a 7yr old that don't require daily growth hormone injections." (Individual w/ DMD B10) •"A lot of parents will be reluctant to have daily shots of synthetic hormones due to expense, time and potential harm of growth hormone." (Caregiver A12)
	Not important for chidlren under 7	•"This seems very early to consider injecting growth hormones, unless the child is extremely deficient in height. It seems early for it to be a self esteem or social issue." (Caregiver B31)
	Shorter stature may be beneficial	•"...I personally think it may be easier to care for them if they are smaller too. I was always afraid of it causing scoliosis to worsen too." (Caregiver B10)
	Important if the treatment works	•"If the treatment works, the boy would feel better about himself if he was closer to the size of a boy his age and the family wouldn't worry so much about the child's mental health and maybe the boy could reach more things or go on more rides with a height minimum." (Caregiver A29)
	Growth would have started to decline in this age group (8-12)	•"At this point, you could start to see a decline in growth progression " (Individual w/ DMD B13)
	Growth hormone might not help/be too late in this age group (13-18)	•"At this age, I've heard the hormone isn't likely to help much." (Caregiver A12)
	Important if there are no other options	•"If there is no other treatment." (Caregiver A26)
	Growth delay can affect self-esteem	•"Maybe not a clinical importance but socially individuals at this age [13-18] would be embarrassed about their height." (Individual w/ DMD B12)
	Treating chidlren with a shortage in naturally produced growth hormone could be a good idea	•"A growth hormone for a child with a shortage of their naturally produced hormone sounds like a good idea." (Caregiver B28)
High Ratings (7-9)	Important if clinically indicated	•"...If there is a reason that it needs to be administered than it should be highly talked about." (Individual w/ DMD A04) •"This may be needed if the child is not hitting all or some of their growth milestones." Caregiver A31)
	Need clear explanation regarding the causes of growth failure	•"I think that the clinical reasoning is important but Duchenne-realated growth failure should be explained more thoroughly so that the differences are more clear." (Caregiver A25)
	Important for patients to grow normally	•"Important for them growing correctly, " (Caregiver A42)
	Important to maintain normal hormone level	•"Important to keep normal hormone levels." (Individual w/ DMD B11)
	Reassuring parents who are not using growth hormones	•"The guideline is quite clear. It will reassure parents that they are doing the •"right thing" by not pursuing hormone therapy for their son. " (Caregiver B21)
	Only using growth hormone when it is necessary	•"The rhGH should not be used routinely to treat Duchenne-related growth failure." (Caregiver A41)
	Using growth hormone before puberty is understandable	•"If growth impairment continues into pre-teen years then I can understand growth hormone treatment being used as a way of being proactive before teenage years & puberty hits." (Individual w/ DMD B10) •"This would be more important as the child approached pubescent age, but probably not as early as 8 years old." (Caregiver B37)
	The older, the harder to treat	•"Same as any other age, except any older and it gets harder to treat" (Caregiver B36)
	May be more important for older children (13-18)	•"Height may be more important to someone older." (Caregiver A29)
	Ages 13-18 are the most important years of growth/treatment	•"At this stage while undergoing puberty, if there are growth issues, then I think the issue could be fairly significant and avenues would need to be explored for treatment." (Individual w/ DMD B10) •"This would be a more important and appropriate time to address growth and hormones as they are in the age of puberty and approaching adulthood when they want to be "normal functioning" adults." (Car…
Acceptability
Rating	Themes	Illustrative Quotations
Low Ratings (1-3)	Highly invasive for questionable efficacy	•"Highly invasive for suspect efficacy." (Individual w/ DMD A12) •"Daily injections would be painful and the hormone is not guaranteed to work." (Caregiver A38)
	High risk with little to no reward	•"I do not believe that it is worth it to go through the therapy compared to the side effects of the growth hormones" (Caregiver B09)
	Everyone is unique	•"Children develop different..." (Caregiver A31)
	Benefit is not worth the cost	•"A shot for so small of a problem is crazy, not even counting the fact that the treatment might not be effective." (Individual w/ DMD A02) •"I think daily injections would be difficult to endure and for what benefit " (Caregiver A14)
	Families are more focused on the muscle aspect	•"I think families aremore worried about muscle weakness." (Caregiver A45)
	Height is not that important	•"Invasive and unimportant." (Caregiver A44)
	Concerns about side effects	•"Way too many questions and concerns raised here." (Caregiver BB22)
	More evidence is needed	•"More evidence that it works is needed." (Individual w/ DMD B01)
	Child should be educated and included in decision making	•"A child between the ages of 13 and 18 should be given proper education on the topic and help make the decision on whether they want to receive the daily injections for hormone therapy." (Caregiver B28)
Uncertain Ratings (4-6)	May not be as important for chidlren under 7	•"May not be as important to do this because there still younger and may just take longer." (Caregiver A45)
	Age under 7 is too young	•"I just don't think it's necessary at this point also kids hate needles." (Individual w/ DMD B13) •"To my understanding, this would not be an acceptable process or treatment at such a young age." (Caregiver B37)
	Benefit is not worth the cost	•"If impaired growth isn't harming the body, than not sure worth the pain, time, and money to do it. Boys may be very resistant, scared, not want it to hurt. " (Caregiver A29)
	Acceptable if patient and family understand the clinical reasons	•"I don't think that a typical family is likely affected by this, but perhaps I just don't know. I think the process is acceptable if the patient and or family understand the reasoning as to why." (Caregiver A25)
	Must compare pros & cons	•"Must compare pros & cons." (Individual w/ DMD A05)
	Already taking lots of supplements and prescriptions (age 8-12)	•"At this age, DMD boys are already taking lots of supplements and prescriptions, so I'm not sure many opt for this." (Caregiver A12)
	Acceptable but questionable	•"If there is no evidence of effectiveness--parents would be skeptical of treatment." (Caregiver A06)
	Daily injections can be difficult for patients and caregivers	•"The prospect of daily injections might seem a hefty price to pay at such a young age. The individual or family might be concerned about pain, especially if somebody is adverse to taking shots." (Individual w/ DMD A01) •"I think daily injections are tough." (Caregiver B10)
High Ratings (7-9)	Acceptable but unnecessary at this age (under 7)	•"At this age I find it acceptable but not really necessary unless another reason to have it done it brought up." (Individual w/ DMD A04)
	Need to see if daily injections are needed/helpful	•"They also need to see if the therapy is needed with daily injections." (Caregiver A07)
	Acceptable if patient wants the treatment	•"At this time too don't question the child if they want to talk to the doctor alone as some may not bring it up if they aren't comfortable with it. " (Individual w/ DMD A04)
	Acceptable if shortage of naturally produced hormone is confirmed	•"Only take the hormone if have a short stature and a confirmed persistent shortage of naturally produced growth hormone." (Caregiver A41)
	Must compare pros & cons	•"All reasons why a child needs to be placed on rhGH along with the possible side effects for the parents to make an educated decision to place their child on it." (Caregiver A31)
	Acceptable but may not be important because growth delay does not affect health	•"...People might feel don't have to do it because not something that helps you live." (Caregiver A29)
	Daily injections are not painful or difficult for the patient	•"My son had to receive daily injections of rhGH. he began giving them to himself after the first couple weeks. it wasn't painful or difficult." (Caregiver B43)
	Acceptable if no other options	•"If growth impairment continues at this age, growth hormone therapy would be acceptable if there are no other options." (Individual w/ DMD B10)
	May be easier for older patients	•"I believe it would be easier for this to be done when the boys were older & understood the benefits of the injections." (Caregiver BB24)
	The older, the harder to treat	•"The older the boys get the harder to treat, it's crucial to catch impairments as early as possible." (Caregiver B36)
	More important if normal growth hasn't happened by this age (13-18)	•"Daily injections are difficult, but it's more important if normal growth hasn't happened by this point." (Individual w/ DMD B11) •"Daily injections would be difficult but may be worth it to an older boy." (Caregiver B37)
	Growth hormone therapy is very acceptable before entering adulthood	•"At this stage while undergoing puberty, if there are growth issues, then growth hormone therapy is very much acceptable before entering adulthood." (Individual w/ DMD B10)

## Sheet: Puberty
Puberty
Recommendation 1: Assessment of puberty
Importance
Rating	Themes	Illustrative Quotations
Low Ratings (1-3)	More important concerns than pubertal delays	•"...I give this a 3 as i believe only delays would be due to steroids and this assumes most boys/youth are using steroids which I do not know to be true or untrue. " (Caregiver A10) •"As long as there is no apparent delays I feel like it's not necessarily required" (Individual w/ DMD B12)
Uncertain Ratings (4-6)	More important concerns than pubertal delays	•"While puberty delays are important I tend to focus more on the medical dealing more with the heart and lungs etc." (Caregiver B16) •"I think it's important to monitor but not as important as other factors." (Caregiver B13)
	Age 9 seems too early to do assessments	•"It's important to detect any delays, but age 9 seems early to me." (Individual w/ DMD B04) •"Most expect delay in puberty for a boy with DMD and I'm not sure it's a big problem at this age to have a delay." (Caregiver A29)
	Assessments require more doctors visits	•"There is no clear cut reason to bring a boy to the doctor twice a year to look at puberty development" (Caregiver B21)
	Self-esteem and living a normal life is important for boys with Duchenne	•"It is best to learn about problems as soon as possible so the choices can be made about the timing of interventions. Most individuals and families with DMD would like to have have "normal" life as possible that includes puberty." (Individual w/ DMD A01) •"I think that more then anything, a boy with Duchenne's safety is important but also there mental state. If they are able to fit in with thei…
High Ratings (7-9)	Assessment is important if taking steroids	•"I would recommend getting this assessment just to make sure that there won't be anything like delayed puberty. I know some do go through it at different times but knowing the side effects of Prednisone and other steroid treatments can cause a delay." (Individual w/ DMD A04) •"If I understand it correctly, the delays in puberty are mostly because of steroids. So, this should be emphasized early …
	Detecting delays helps patients keep up with peers and affects self-esteem	•"It would detect delays which would help the boys keep up with peers." (Individual w/ DMD B10) •"Going through puberty when your friends do is important. It is important for self-esteem. " (Caregiver B07)
	Being proactive and early detection are important	•"It is important to get early care to find out why the delay is happening and what is the best way to deal with it. " (Caregiver A07)
	Assessing effects of steroids on delayed puberty is important	•"With using Emflaza, steroid seeing how that delays puberty would be helpful." (Caregiver A32) •"I think this is really great because of how steroids can affect their puberty. " (Caregiver A28)
Acceptability
Rating	Themes	Illustrative Quotations
Low Ratings (1-3)	Assessment of puberty can be invasive	•"Very invasive for what I find of little benefit if there are no obvious signs." (Individual w/ DMD A12) •"It seems unnecessarily invasive, especially to boys who already have extra medical attention. " (Caregiver B14)
	Assessments require more doctors visits and can be costly	•"Another medically unnecessary visit to a doctor is cumbersome and would not necessarily be covered by health care insurance." (Caregiver B21) •"It is embarrassing and it is costly if insurance does not pay" (Caregiver B09)
Uncertain Ratings (4-6)	A less intrusive process would be preferred	" I'm uncertain, because if that's the only way then it needs to be done, but a less intrusive way would make anyone way more likely to participate" (Individual w/ DMD A02) •"I would prefer a more passive way to monitor puberty than a full genital examination." (Caregiver B13)
	May be too early for this type of assessment	•"...Parents might feel it's too early for something like that." (Individual w/ DMD B12) •"I think most parents would think it is just too young, unless their dr convinced them to" (Caregiver B37)
	This assessment is not as high priority as others	•"It can be hard to fit in all the medical appointments for a typical family. Endocrine may be the area that families could forgo if there is not a compelling medical reason to see an endocrinologist 2x per year." (Caregiver B41) •"Perhaps not a priority but sounds easy to have done." (Caregiver A29)
High Ratings (7-9)	Process is simple but provides important information	•"I see this as acceptable as most can get this assessment by getting a physical just to make sure there isn't any red flags popping up. " (Individual w/ DMD A04) •"I think this is something simple and easy for the boys and yet it gives important information. " (Caregiver B10)
	Typical examination procedure that does not require extra visits to specialists	•"...I think it fits into the already established routine and doesnt include another scheduled visit to another specialist... " (Caregiver A10) •"...As this assessment could be be completed pediatrician locally means that travel to specialty centers is not required" (Individual w/ DMD A01)
	Important but may be embarrassing for patients	•"It might be embarrassing, but I don't think there's another way to track puberty." (Individual w/ DMD B10) •"It's necessary, but it can be difficult for children due to modesty/ feeling uncomfortable." (Caregiver A18)
Recommendation 2: Assessment and treatment of delays in puberty
Importance
Rating	Themes	Illustrative Quotations
Low Ratings (1-3)	Not important depending on the individual	•"Not important. I didn't reach puberty until about the end of my 15th year." (Individual w/ DMD B09)
Uncertain Ratings (4-6)	Puberty is less of a priority than other issues	•"I have to say that in my family I did not believe it was as important as my 13 year old son now thinks it is...this is important, but not the MOST important thing. " (Caregiver A28) •"Puberty doesn't matter that much compared to everything else." (Individual w/ DMD B04)
High Ratings (7-9)	Important for patient's self-esteem and ability to fit in with peers	•"The age of 14 is the time to intervene because it's the social pressures teens feel to fit in with their peers when it comes to dating." (Individual w/ DMD A01) •"This is where it gets harder for the boys, when they see their peers growing and hitting puberty, they feel.out of place, can cause depression and make it harder on the boys" (Caregiver B36)
	Underlying cause must be found if no signs of puberty by expected age	•"If puberty is delayed beyond what is considered normal, of course it has to be assessed further. Something could be seriously wrong." (Individual w/ DMD B10) •"If the boy hasn't started showing signs of puberty by 14, he will need to find the underlying factor." (Caregiver A38) •"Would be important to know why there is a delay. Whether its medication related or something else. " (Caregiver B05)
	Detecting issues early gives more treatment options	•"It is important to get this if the doctors or the person is feeling like they aren't going through puberty when they should as some may have self-esteem problems and catching a problem early can be better when it comes to treatment options." (Individual w/ DMD A04) •"If not addressed early, they may not be treatable later on in life." (Caregiver B09)
Acceptability
Rating	Themes	Illustrative Quotations
Low Ratings (1-3)	Can be humiliating for patient	•"It's a bit humiliating to associate testicle size with muscular dystrophy " (Individual w/ DMD B05)
Uncertain Ratings (4-6)	Age 14 is too late	•"14 is too old/too late" (Caregiver B37)
	Concerns about exam/side effects	•"I don't believe that any type of drug or medication should be used to advance puberty especially in a situation like this only if it causing harmful effects to the young man should medication be considered" (Caregiver B16) •"I don't mind being referred to an endocrinologist, but have concerns about the exam." (Caregiver B30)
High Ratings (7-9)	Insurance coverage may affect acceptability	•"Acceptable if insurance covers the testing and treatment" (Caregiver A10) •"Seeing a specialist is no problem. It may be difficult for some if insurance doesn't cover the visit." (Caregiver B08)
	Helps patients fit in with their peers	•"I believe it is acceptable as the boys are at the age and stage in their lives where most of their peers are towering over them along with changing in puberty and they are not. They want to fit in just like their peers, so if they choose to have some care to assist this it is good." (Caregiver A45) •"This is acceptable to me as I feel I when through puberty a little later because of the long te…
	Talking to a specialist is acceptable, good for assessing delays and learning about treatment options	" It's perfectly reasonable to have an appointment to at least talk about it" (Caregiver A12) •"Seeing an endocrinologist to further assess pubertal delays is a good process. Finding a delay and assessing it and finding a fix for the problem is a must." (Caregiver B28) •"I was not familiar that endocrinologist is the specialist to see for puberty issues. It's within reason to see proper specialis…
Recommendation 3: Use of testosterone replacement therapy to treat delays in puberty
Importance
Rating	Themes	Illustrative Quotations
Low Ratings (1-3)	Potential of negative side effects (like mood swings)	•"I'm not sure I'd agree with this recommendation, particularly in light of the additional information given here. Steriods and Duchenne tend to come with the mooed swings and other issues, I think adding to that may complicate behavior issues more." (Caregiver B41) •"I am not sold that this is a viable answer because testosterone has other side effects" (Caregiver B12)
	Not interested in hormone treatment	•"I do not agree with hormone treatment recommendations. i do not know what other families think about hormone treatments. " (Individual w/ DMD B09) •"Not a fan of hormone replacement under any circumstances" (Caregiver B16)
Uncertain Ratings (4-6)	Not as high priority as other health issues	•"It seems of secondary importance, unless there are physiological risks of which I am unaware." (Caregiver B35)
High Ratings (7-9)	Delayed puberty can lead to emotional problems and lack of self-esteen	•"Development is important because I would think it would be embarrassing to not keep up with peers. I imagine if I were a child again knowing that I am going through the same thing my friends are what help with social development as well..." (Caregiver A31) •"If an individual with Duchenne is expected to grow up puberty needs to occur to this possible someday to have children. Delayed puberty ca…
	Important but side effects must be monitored	•"This is important as long as the testosterone is monitored, and does not make the boys more aggressive, since the steroid might. " (Caregiver B34)
	Puberty and treatment are also good for bone health	•"Testerone injections--initiated pubertal development in my son--but also played a role in increasing bone density." (Caregiver A06) •"For me this was our choice, my sons were not too concerned with going through puberty, we did this for their bone health... " (Caregiver B10)
Acceptability
Rating	Themes	Illustrative Quotations
Low Ratings (1-3)	Potential of negative side effects (like mood swings)	•"No medications need to be given to bring on more adverse effects" (Caregiver B16)
Uncertain Ratings (4-6)	More information is needed about the procedure and side effects	•"Individual family choice. Could be difficult for a family if using topical treatments since there are lot's of potential side effects if not careful. " (Caregiver A39) •"The process seems harmless but I'd want to know more about possible side effects." (Caregiver B44)
	Patients must take part in this decision	•"I think it is an important option but again the boys need to have the ultimate decision in this. they have to endure the injection and decide if they would like to try this." (Individual w/ DMD B12) •"I think this is an issue that both the family and patient need to agree on. ...I don't think any patients should be given something, unless they are in total agreement with the reasons, the therap…
High Ratings (7-9)	Potential side effects must be considered	•"The side effects and risks need to be clearly explained to patient and caregiver(s)." (Individual w/ DMD A12) •"As long as it's safe, especially with any other medications being taken. " (Caregiver B01)
	Acceptable depending on tolerance to needles	•"Depends on the child and how they feel about more tests and more drugs and more needles. Team planning!!" (Caregiver A26) •"For us it is going well, both my boys tolerate the shots just fine and and we have had no adverse reactions. I think it is not too bad of an option. " (Caregiver B10)
Recommendation 4: Use of testosterone therapy while taking glucocorticoids
Importance
Rating	Themes	Illustrative Quotations
Low Ratings (1-3)	Allow boys to develop at their own pace	•"Let each individual unfold uniquely, steroids destroy children's lives for the hope of maintaining strength & destroys there immune system." (Individual w/ DMD B05)
	Less important than other health issues at this point	•"I think this isnt as important the muscle weakness is a lot more to consider than this at this point." (Caregiver B32) •"The age is a bit younger, so it seems less important." (Individual w/ DMD B01)
Uncertain Ratings (4-6)	Helps patient keep up with peers	•"I am still undecided but if it's helping the boys develope and keep up with their peers that's a great thing, but could it hurt them down the road as they get older?" (Caregiver B36) •"I want my son to have as •"normal" an adolescence as possible." (Caregiver A06)
	Potential for negative side effects (mood swings)	•"I know that from experience steroids can cause mood swings so I rated recommendation 5 higher than recommendation 4" (Individual w/ DMD B12) •"Not sure about this one; mood swings can be so bad already." (Caregiver B25)
High Ratings (7-9)	Helps patient keep up with peers	•"To be normal and develop into an adult this process needs to begin." (Individual w/ DMD A01) •"To keep my son fitting in as much as possible is a big deal to me, as i'm sure everyone else in this situation. " (Caregiver B28)
	Important if patients are on steroids	•"It is important because staying on the steroids is important" (Individual w/ DMD A02) •"Their bone health is so important, I wish this option was made available to us at an earlier age, but I think it is a good option as my sons are also on steriods. " (Caregiver B10)
Acceptability
Rating	Themes	Illustrative Quotations
Low Ratings (1-3)	Allow boys to develop at their own pace	•"Too much trouble. sooner or later the boy will mature." (Individual w/ DMD B09)
	Gradual approach would be better	•"Individuals and families who might have difficulties with the side effects of both steroids and testosterone. I think individuals and families would prefer a gradual approach" (Individual w/ DMD B12)
	Not convinced by reasons for hormonal therapy	•"I am not convinced of a compelling reason to recommend testosterone to a typical family." (Caregiver B41)
Uncertain Ratings (4-6)	Concerns of side effects and mental wellbeing	•"I am not sure whether there are any side-effects to using testosterone alongside glucocorticoids so I don't know how acceptable or not acceptable that procedure is." (Individual w/ DMD B10) •"Further mood and behavior altering could be a concern." (Caregiver A40)
	May be difficult getting insurance coverage or accessing treatment	•"Can be hard to access endocrine if they are not part of multi-disciplinary clinic. in this area, long wait to get in to see endocrine, so its easy to put off appointments" (Caregiver A20) •"I find it acceptable to the ones who want to get it but like I said before I wouldn't know the affordability or the amount of time so that's why I gave this a 5." (Individual w/ DMD A04)
High Ratings (7-9)	More information about possible side effects is needed	•"Information must be included on the side effects of doing this and the benefits as well…" (Caregiver B13) •"I would repeat that any potential health risks of adverse drug interactions would have to be clearly explained." (Caregiver B01)
	Helpful to manage puberty while on steroids	•"If someone isn't showing signs of puberty, this would be something that should considered. The use of glucocorticoids can stunt growth in all aspects of the body." (Caregiver B28) •"It completely makes sense, it also takes into account the use of steroids, which is great." (Caregiver A42)
Recommendation 5: Testosterone dosing to mimic normal pubertal development
Importance
Rating	Themes	Illustrative Quotations
Low Ratings (1-3)	Not important to mimic normal pubertal development	•"I don't think it's important enough to be mimicking something like that" (Individual w/ DMD A02) •"The problem doesn't seem the most pressing of most families' concerns." (Individual w/ DMD B01)
	More medications to take	•"one more medicine to take." (Caregiver B09)
Uncertain Ratings (4-6)	Concern about side effects	•"This seems like it could cause harm and make it harder for caregivers, it's good for the boys to hit puberty and to grow up like other boys their age, but I'm worried about these side effects being a lot more intense than a typical boy hitting puberty" (Caregiver B36)
	Unsure of importance of treatment for puberty	•"If this is being soley to mimic puberty, I think that is a per case decision. I am not sure I would do it just for puberty unless my sons wanted it. " (Caregiver B10) •"I don't believe this as of high importance however if its in low doses it may be ok." (Caregiver A45)
High Ratings (7-9)	Low dosage is important to ensure patient safety	•"I definitely agree with a low dose to gradually increasing dosage. " (Caregiver A39) •"Gradually increasing the dosage makes sense " (Individual w/ DMD A09)
	Process should be as natural as possible	•"If this is to be done it makes sense to mimic the natural development." (Individual w/ DMD A12) •"Natural course will cause less embarrassment." (Caregiver A43)
	Important to ensure normalcy and keep up with peers	•"I like the idea of mimicking normal development, because by preteen years, when puberty should be starting, they are realizing that they are not as "normal" as their peers appear to be." (Caregiver B31) •"I think this is important for the ones who think they are having a delay in puberty or are self-conscious about being short and other things." (Individual w/ DMD A04)
Acceptability
Rating	Themes	Illustrative Quotations
Low Ratings (1-3)	Treatment is too long-term	•"It's such a long-term treatment, that it seems many families would avoid it." (Individual w/ DMD B01) •"I think it's important to try to mimic normal development so the outcome is more predictable and safe, but it sounds like it may take far too long to reach a therapeutic level." (Caregiver B43)
	Puberty is not as much of a concern as other health issues	•"I don't think families are near as concerned about puberty as in their child losing muscles and weakening muscles." (Caregiver A45)
Uncertain Ratings (4-6)	Families may want patients to keep up with their peers	•"It would mimic puberty in an average boy which would help the boys grow up with their peers" (Caregiver B36) •"Unsure if families willing to do this if they have bigger concerns about DMD. They may want kid to keep up with peers. " (Caregiver A29)
	Best to start with low dosage and increase gradually	•"I think most parents would agree that if they chose to take on this therapy they would want to start with a low dose and then increase as needed." (Caregiver B44) •"Starting with low and slow doses to bring on puberty may lessen the effects of typical teenage male behavior when as a high dosage may cause this to be brought on quicker." (Caregiver A31)
	Concern about length of time for treatment	•"Simple process but the length of time is a compounding factor." (Individual w/ DMD A12)
High Ratings (7-9)	Best to start with low dosage and increase gradually	•"It's not a sudden change, but gradual, which is preferred." (Caregiver A42)
	Strong scientific evidence to support recommendation	•"We want to do what is best for our children and there is plenty of scientific evidence to support this recommendation." (Caregiver A43)
	Individuals with Duchenne want to keep up with peers, and have children of their own	•"I would say it is acceptable because the other option of avoiding puberty altogether is not acceptable in case if the individual wishes to have children of their own down the line. It's not for the family or doctors to decide but the individual after turning 18." (Individual w/ DMD B10) •"Most families and individuals want a normal trajectory that the process does by slowly and incrementally in…
